# Supplementary material for: Diet-Related Metabolic Perturbations of Gut Microbial Shikimate Pathway-Tryptamine-tRNA Aminoacylation-Protein Synthesis in Human Health and Disease
Source: PubMed Central journal article supplement — Int J Tryptophan Res. 2019 Mar 28;12:1178646919834550. doi: 10.1177/1178646919834550 (PMC6440052; doi:10.1177/1178646919834550), 2019-03-28
Supplement: Paley_Manuscript_Supplementary__3-22-2019.pdf [file Paley_Manuscript_Supplementary__3-22-2019.pdf]

**Abbreviations used in the article**

NQR - Na(+)-transporting NADH:ubiquinone reductase; TrpRS - tryptophanyl-tRNA synthetase; MAO - monoamine oxidase; ADAS – Alzheimer’s disease associated sequence; AD – Alzheimer’s disease; C&A - American Indian Cheyenne & Arapaho; NNI - non-native individuals; T2D - type 2 diabetes; CRC - colorectal cancer; Trp – tryptophan; Q – ubiquinone; SP - shikimate pathway; WARS – gene of tryptophanyl-tRNA synthetase; NFT - neurofibrillary tangles of filaments; AAA - aromatic amino acid/s; AAAD - aromatic amino acid decarboxylase; PEA – phenethylamine; INF - interferon, IDO - indoleamine-2,3-dioxygenase; MS – mass spectrometry; IAA - indole-3-acetic acid; NCBI - The National Center for Biotechnology Information; mAb - monoclonal antibodies; 4-HBA - 4-hydroxybenzoate; Kyn – kynurenate; TDO - tryptophan 2,3-dioxygenase; NAFLD - non-alcoholic fatty liver disease; IBD - inflammatory bowel disease; UC - ulcerative colitis; CD - Crohn’s disease; AS - ankylosing spondylitis; HE - hepatic encephalopathy; RAU - aphthous ulcer; IBS - irritable bowel syndrome; 18F-FDG - 18F-fluorodeoxyglucose; SFB – spore forming bacteria; MAOI – monoamine oxidase inhibitor; PD – Parkinson’s disease; CKD - chronic kidney disease; TCP – tranylcypromine; dbGaP - database of Genotypes and Phenotypes; AC – activated charcoal; HD - hemodialysis patients; SD – standard deviation; BA – biogenic amines; ASD - autism spectrum disorders; CH - chronic cluster headaches.

### Supplementary Tables S1-S4; Figure S1; Supplemental file 1: Link of Trp to Q

**Table S1 Prevalence of ADAS (89% and 100% nucleotide identity) in different human gut metagenomics studies.**

| COUNTRY             | PARTICIPANTS | ADAS+ individuals | DIAGNOSIS or STATUS                                            |
|---------------------|--------------|-------------------|----------------------------------------------------------------|
| MO, USA             | 2            | 1                 | obese co-twin                                                  |
| Canada              | 24           | 2                 | healthy, after Cefprozil                                       |
| OK, USA             | 37           | 4                 | American Indian                                                |
| UK                  | 6            | 1                 | healthy                                                        |
| Denmark             | 13           | 3                 | morbidly obese                                                 |
| Germany             | 16           | 3                 | obese and NAFLD, inulin                                        |
| Sweden              | 12           | 2                 | atherosclerosis                                                |
| Sweden              | 13           | 1                 | healthy control                                                |
| Australia           | 12           | 3                 | healthy, western diet                                          |
| MO, USA             | 84           | 1                 | preterm infants                                                |
| Europe              | ~100         | 4                 | infants                                                        |
| Europe              | ~100         | 9                 | mothers after birth                                            |
| TX, MO, USA         | 300          | 4                 | healthy                                                        |
| China               | 54           | 1                 | healthy control                                                |
| China               | 74           | 6                 | CRC                                                            |
| Washington, DC, USA | 52           | 1                 | healthy control                                                |
| Washington, DC, USA | 52           | 14                | CRC                                                            |
| AL, USA             | 6            | 1                 | donor, transplant to recurrent Clostridium difficile infection |
| MA, USA             | 19           | 1                 | CD; after fecal transplant                                     |
| Germany             | 59           | 1                 | control; 31 PD, 28 controls                                    |
| China               | 211          | 1                 | ankylosing spondylitis patient; 97 AS, 114 controls            |

**Table S2. Chromosomal and gene abnormalities induced by tryptamine**

| Species                          | cells/organs                                              | Abnormalities description                                                            | References      |
|----------------------------------|-----------------------------------------------------------|--------------------------------------------------------------------------------------|-----------------|
| Human                            | HeLa cells, cervical cancer, prolonged treatment          | TrpRS gene dose decrease                                                             | Present study   |
| Hamster Chinese                  | SV40-transformed 631 embryonic cells, prolonged treatment | TrpRS gene dose decrease                                                             | Present study   |
| Bovine animal                    | Kidney cells MDBK, prolonged treatment                    | Additional material in aberrated marker chromosome, frequency of its duplication 96% | <sup>1, 2</sup> |
| Hamster Djungarian               | SV40-transformed DM 15 fibroblasts, prolonged treatment   | Additional material, chromosomes 5 and 7, short arm                                  | <sup>3</sup>    |
| Nucleic acid base, cytosine base | Crystal structure, X-ray                                  | Stacking interaction, probable single nucleotide polymorphisms                       | <sup>4</sup>    |
| Salmonella typhimurium           | Bacterial cells                                           | Mutagenic products of nitrosation of tryptamine                                      | <sup>5, 6</sup> |
| Rat                              | Cultured hepatocytes                                      | DNA adducts                                                                          | <sup>7</sup>    |
| Rat                              | Liver tissue homogenate S9                                | Suppress DNA synthesis                                                               | <sup>7</sup>    |
| Salmonella typhimurium           | S-9 fractions from mice                                   | Counteract genotoxicity of cooked-food mutagens                                      | <sup>8</sup>    |

**Table S3. Concentrations of fecal biogenic amines ( $\mu\text{mol/g}$  of fecal dry matter) for cats fed select fibers <sup>9</sup>.**

| BA         | Treatment with Fibers |      |        |
|------------|-----------------------|------|--------|
|            | Cellulose             | FOS  | Pectin |
| Histamine  | 0.23                  | 0.29 | 0.29   |
| Tryptamine | 1.17                  | 5.77 | 6.02   |
| Tyramine   | 1.38                  | 0.24 | 1.71   |

Cellulose, fructooligosaccharides (FOS), or pectin incorporated into the diets at 4% before extrusion. Cellulose is a very lowly fermentable, insoluble fiber. For this reason, it also served as the control. Cats were offered their assigned diet twice daily. Intake, gram/day of dry matter was at 70.3 (cellulose), 68.7 (FOS) and 66.6 (pectin).

**Table S4. Tryptamine and ADAS in Human Groups or Diseases**

| Group/Diagnosis                     | ADAS     | Tryptamine, human cases vs controls        |
|-------------------------------------|----------|--------------------------------------------|
| C&A                                 | 89%-100% | increase, stool <sup>10</sup>              |
| CRC                                 | 89%      | increase, stool <sup>11</sup>              |
| CKD                                 | n/d      | increase, stool <sup>12</sup>              |
| CKD+AC                              | n/d      | decrease, stool <sup>12</sup>              |
| PD                                  | 72-75%   | increase, urine <sup>13</sup>              |
| Cataract                            | n/d      | increase, cataractous lenses <sup>14</sup> |
| cirrhotic/HE                        | n/d      | increase, brain tissue <sup>15</sup>       |
| AD                                  | 100%     | n/d <sup>16</sup>                          |
| IBD/IBS                             | 89%      | increase, stool <sup>17</sup>              |
| Gastroenteritis (diarrhea), infants |          | increase, fecal <sup>18</sup>              |
| RAU                                 | n/d      | increase, saliva <sup>19</sup>             |
| Formula-fed infants                 | n/d      | increase, fecal <sup>20</sup>              |
| Autism (severe/mild)                | n/d      | increase, stool <sup>21</sup>              |
| Autism                              | n/d      | increase IAA, urine <sup>22</sup>          |
| CH                                  | n/d      | increase, plasma <sup>23</sup>             |
| NAFLD                               | 88%      | increase HE, brain <sup>15</sup>           |

n/d – no data available

**Figure S1. Large interindividual variation of tryptamine content ( $\mu\text{g}/\text{gram}$  of dry matter) in stool samples of 68 healthy humans**

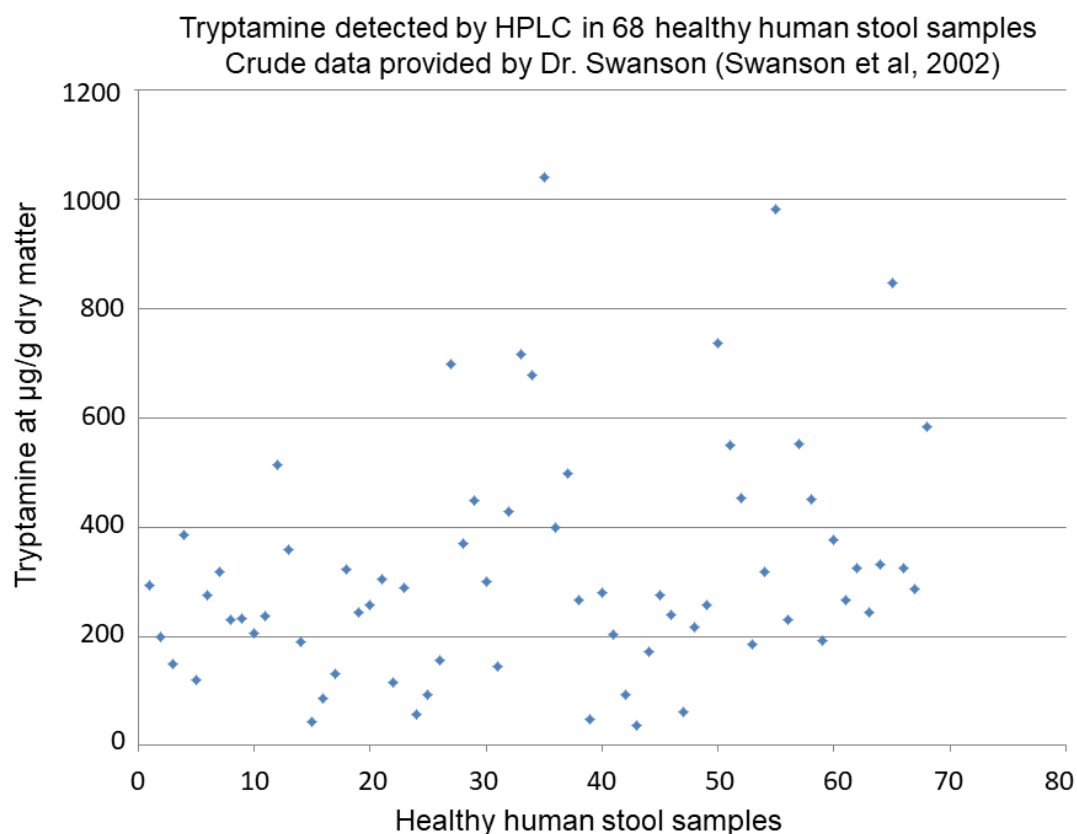

HPLC detection and quantification of tryptamine in human stool samples (IL, U.S.A.) was reported earlier along with a mean tryptamine content (mean value  $2.00 \pm 1.24 \mu\text{mol}/\text{g}$  dry matter)<sup>24</sup>. The unreported crude data on human fecal tryptamine were kindly provided by Drs G.C. Fahey and K.S. Swanson. To the best of my knowledge, these presented data are the only available tryptamine quantification in stool samples of adult humans. In other reported studies, tryptamine was detected but not quantified in stool samples (<http://www.hmdb.ca/metabolites/HMDB0000303>).

### Supplemental file 1: Link of tryptophan (Trp) to ubiquinone (Q)

Density-dependent production of toxic factors regulated by the *Pseudomonas* quinolone signal (2-heptyl-3-hydroxy-4-quinolone; PQS) has been proposed to be involved in *P. aeruginosa* virulence. PQS biosynthesis requires conversion of the central metabolite chorismate to anthranilate by anthranilate synthase. This reaction is also the first step in Trp biosynthesis with usage of two functional anthranilate synthases TrpEG and PhnAB of *P. aeruginosa*<sup>25</sup>. Quinolones are inhibitors of ubiquinone functions in the mitochondrial respiratory chain<sup>26</sup>. The 1H-quinolin-2-one (2(1H)-quinolone) was detectable in six NNI (26%) and five C&A (13.1%) including one ADAS<sup>+</sup> individual (23 NNI and 35 C&A). The 2,8-quinolinediol was detectable in 10 NNI (43.47%) and 13 C&A (37.14%) including ADAS<sup>+</sup>/T2D/obese individual and four individuals with T2D/obesity (BMI  $\geq$  30). Quinolines are excreted in increased quantities following the administration of Trp. However, the urinary quinoline derivative 2,8-quinolinediol was identified in rats that were fed diets containing corn<sup>27</sup>.

The exogenous ubiquinone homologues Q2, Q4, Q6 and Q10 were able to cross the pig heart mitochondrial membrane to interact (to be reduced) with a transmembrane NADH-Q reductase<sup>28</sup>. Furthermore, in beef heart mitochondria, the oxidation of NADH occurs strictly from the matrix side of the membrane<sup>29</sup>. The length of the isoprenoid side chain (n) of Q varies depending on the species and ranges from n = 6 in yeast (*S. cerevisiae*) to n = 10 (humans)<sup>30</sup>. It means that exogenous bacterial *E. coli* Q8<sup>31</sup>, *Protobacteria* bacterium Q7 or yeast Q2, Q3, Q5, Q7<sup>32</sup> can interact with human mitochondrial NADH-Q reductase, which normally, binds its substrate Q10. Respiratory complex I (NADH:ubiquinone oxidoreductase), one of the largest membrane-bound enzymes in mammalian cells, powers ATP synthesis by using the energy from electron transfer from NADH to Q10 to drive protons across the energy-transducing mitochondrial inner membrane. The kinetics of complex I catalysis with Q of varying isoprenoid chain length, from 1 to 10 units were studied. Structural data show the hydrophobic channel for Q10 is interrupted by a highly charged region at isoprenoids 4–7. Q10 has both the highest binding affinity and the fastest binding rate<sup>33</sup>. Coenzyme Q(0), a strong electrophile, is toxic to insulin-producing cells<sup>34</sup> and human breast cancer cells<sup>35</sup>. The Na<sup>+</sup>-dependent NADH:quinone oxidoreductase of anaerobic *Klebsiella pneumoniae* interacts with Q1 in micromolar concentrations<sup>36</sup>. A role of the Q tail is not simply the enhancement of the hydrophobicity of the molecule. The molecular recognition of the tail by the Q redox site differs among the respiratory enzymes<sup>37</sup>. Thus, it can be suggested that microbial Q of varying isoprenoid chain length of tail but shorter than 10 can interrupt the activity of human respiratory complex I.

## REFERENCES

1. Paley EL, Baranov VN, Alexandrova NM and Kisselev LL. Tryptophanyl-tRNA synthetase in cell lines resistant to tryptophan analogs. *Exp Cell Res.* 1991; 195: 66-78.
2. Paley EL and Aleksandrova NM. [Karyological and morphological analysis of bovine kidney cells resistant to tryptophan analogs--inhibitors of tryptophanyl-tRNA synthetase]. *Genetika.* 1986; 22: 473-80.
3. Paley EL, Massino, Yu, S., Baranov, V. N., and Alexandrova, and M.: N. Mechanisms of nephrotoxicity: the basis for early diagnosis, modulation of effects, and improved therapeutic management. Abstracts of the Fourth International Nephrotoxicity Symposium. July 23-28, 1989, Guildford, England. *Ren Fail.* 1989; 11: 223-86.
4. Ishida T, Ueda H, Segawa K, Doi M and Inoue M. Prominent stacking interaction with aromatic amino acid by N-quarternization of nucleic acid base: X-ray crystallographic characteristics and biological implications. *Arch Biochem Biophys.* 1990; 278: 217-27.
5. Gatehouse D and Wedd D. The bacterial mutagenicity of three naturally occurring indoles after reaction with nitrous acid. *Mutat Res.* 1983; 124: 35-51.
6. Shephard SE, Hegi ME and Lutz WK. In-vitro assays to detect alkylating and mutagenic activities of dietary components nitrosated in situ. *IARC Sci Publ.* 1987: 232-6.
7. Reddy MV, Storer RD, Laws GM, et al. Genotoxicity of naturally occurring indole compounds: correlation between covalent DNA binding and other genotoxicity tests. *Environ Mol Mutagen.* 2002; 40: 1-17.
8. Alldrick AJ and Rowland IR. Counteraction of the genotoxicity of some cooked-food mutagens by biogenic amines. *Food Chem Toxicol.* 1987; 25: 575-80.
9. Barry KA, Wojcicki BJ, Middelbos IS, Vester BM, Swanson KS and Fahey GC, Jr. Dietary cellulose, fructooligosaccharides, and pectin modify fecal protein catabolites and microbial populations in adult cats. *J Anim Sci.* 2010; 88: 2978-87.
10. Sankaranarayanan K, Ozga AT, Warinner C, et al. Gut Microbiome Diversity among Cheyenne and Arapaho Individuals from Western Oklahoma. *Curr Biol.* 2015; 25: 3161-9.
11. Goedert JJ, Sampson JN, Moore SC, et al. Fecal metabolomics: assay performance and association with colorectal cancer. *Carcinogenesis.* 2014; 35: 2089-96.
12. Liu S, Liang S, Liu H, et al. Metabolite Profiling of Feces and Serum in Hemodialysis Patients and the Effect of Medicinal Charcoal Tablets. *Kidney Blood Press Res.* 2018; 43: 755-67.
13. Luan H, Liu LF, Meng N, et al. LC-MS-based urinary metabolite signatures in idiopathic Parkinson's disease. *J Proteome Res.* 2015; 14: 467-78.
14. Candia OA, Alvarez LJ, Lanzetta PA and Cook P. Tryptamine in the vertebrate lens. *Biochim Biophys Acta.* 1983; 762: 232-40.
15. Mousseau DD, Layrargues GP and Butterworth RF. Region-selective decreases in densities of [3H]tryptamine binding sites in autopsied brain tissue from cirrhotic patients with hepatic encephalopathy. *J Neurochem.* 1994; 62: 621-5.
16. Paley EL, Merkulova-Rainon T, Faynboym A, Shestopalov VI and Aksenoff I. Geographical Distribution and Diversity of Gut Microbial NADH:Ubiquinone Oxidoreductase Sequence Associated with Alzheimer's Disease. *J Alzheimers Dis.* 2018; 61: 1531-40.
17. Ponnusamy K, Choi JN, Kim J, Lee SY and Lee CH. Microbial community and metabolomic comparison of irritable bowel syndrome faeces. *J Med Microbiol.* 2011; 60: 817-27.
18. Murray KE, Adams RF, Earl JW and Shaw KJ. Studies of the free faecal amines of infants with gastroenteritis and of healthy infants. *Gut.* 1986; 27: 1173-80.

19. Li Y, Wang D, Zeng C, Liu Y, Huang G and Mei Z. Salivary metabolomics profile of patients with recurrent aphthous ulcer as revealed by liquid chromatography-tandem mass spectrometry. *J Int Med Res.* 2018; 46: 1052-62.
20. Chow J, Panasevich MR, Alexander D, et al. Fecal metabolomics of healthy breast-fed versus formula-fed infants before and during in vitro batch culture fermentation. *J Proteome Res.* 2014; 13: 2534-42.
21. Gondalia SV, Mahon PJ, Palombo EA, Knowles SR and Austina DW. Evaluation of Biogenic Amines in the Faeces of Children with and without Autism by LC-MS/MS. *International Journal of Biotechnology and Biochemistry.* 2013; 9: 245-55.
22. Gevi F, Zolla L, Gabriele S and Persico AM. Urinary metabolomics of young Italian autistic children supports abnormal tryptophan and purine metabolism. *Mol Autism.* 2016; 7: 47.
23. D'Andrea G, Bussone G, Di Fiore P, et al. Pathogenesis of chronic cluster headache and bouts: role of tryptamine, arginine metabolism and alpha1-agonists. *Neurol Sci.* 2017; 38: 37-43.
24. Swanson KS, Grieshop CM, Flickinger EA, et al. Fructooligosaccharides and Lactobacillus acidophilus modify bowel function and protein catabolites excreted by healthy humans. *J Nutr.* 2002; 132: 3042-50.
25. Palmer GC, Jorth PA and Whiteley M. The role of two Pseudomonas aeruginosa anthranilate synthases in tryptophan and quorum signal production. *Microbiology.* 2013; 159: 959-69.
26. Oettmeier W, Masson K, Soll M and Reil E. Acridones and quinolones as inhibitors of ubiquinone functions in the mitochondrial respiratory chain. *Biochem Soc Trans.* 1994; 22: 213-6.
27. Inagami K, Kaihara M and Price JM. The identification of 2,8-quinolinediol in the urine of rats fed a diet containing corn. *J Biol Chem.* 1965; 240: 3682-4.
28. Chen M, Liu BL, Gu LQ and Zhu QS. The effect of ring substituents on the mechanism of interaction of exogenous quinones with the mitochondrial respiratory chain. *Biochim Biophys Acta.* 1986; 851: 469-74.
29. Zhu QS and Beattie DS. Direct interaction between yeast NADH-ubiquinone oxidoreductase, succinate-ubiquinone oxidoreductase, and ubiquinol-cytochrome c oxidoreductase in the reduction of exogenous quinones. *J Biol Chem.* 1988; 263: 193-9.
30. Clarke CF, Williams W and Teruya JH. Ubiquinone biosynthesis in Saccharomyces cerevisiae. Isolation and sequence of COQ3, the 3,4-dihydroxy-5-hexaprenylbenzoate methyltransferase gene. *J Biol Chem.* 1991; 266: 16636-44.
31. Aussel L, Pierrel F, Loiseau L, Lombard M, Fontecave M and Barras F. Biosynthesis and physiology of coenzyme Q in bacteria. *Biochim Biophys Acta.* 2014; 1837: 1004-11.
32. Degli Esposti M. A Journey across Genomes Uncovers the Origin of Ubiquinone in Cyanobacteria. *Genome Biol Evol.* 2017; 9: 3039-53.
33. Fedor JG, Jones AJY, Di Luca A, Kaila VRI and Hirst J. Correlating kinetic and structural data on ubiquinone binding and reduction by respiratory complex I. *Proc Natl Acad Sci U S A.* 2017; 114: 12737-42.
34. MacDonald MJ, Husain RD, Hoffmann-Benning S and Baker TR. Immunochemical identification of coenzyme Q0-dihydrolipoamide adducts in the E2 components of the alpha-ketoglutarate and pyruvate dehydrogenase complexes partially explains the cellular toxicity of coenzyme Q0. *J Biol Chem.* 2004; 279: 27278-85.
35. Somers-Edgar TJ and Rosengren RJ. Coenzyme Q0 induces apoptosis and modulates the cell cycle in estrogen receptor negative breast cancer cells. *Anticancer Drugs.* 2009; 20: 33-40.
36. Dimroth P and Thomer A. A primary respiratory Na<sup>+</sup> pump of an anaerobic bacterium: the Na<sup>+</sup>-dependent NADH:quinone oxidoreductase of Klebsiella pneumoniae. *Arch Microbiol.* 1989; 151: 439-44.



37. Sakamoto K, Miyoshi H, Ohshima M, et al. Role of the isoprenyl tail of ubiquinone in reaction with respiratory enzymes: studies with bovine heart mitochondrial complex I and *Escherichia coli* bo-type ubiquinol oxidase. *Biochemistry*. 1998; 37: 15106-13.
